# Supplementary material for: Cell-specific expression of ENACα gene by FOXA1 in the glucocorticoid receptor pathway
Source: PubMed Central journal article supplement — Int J Immunopathol Pharmacol. 2020 Aug 24;34:2058738420946192. doi: 10.1177/2058738420946192 (PMC7450284; doi:10.1177/2058738420946192), 2020-08-24
Supplement: 2020_05_18_A549_ARPE19_Supple_Figures_R1.pdf [file 2020_05_18_A549_ARPE19_Supple_Figures_R1.pdf]

# Supplementary Figure S1

## ARPE-19

| Term                                                                   | Overlap | P-value     | Adjusted P-value | Old P-value | Old Adjusted P-value | Z-score      | Combined Score |
|------------------------------------------------------------------------|---------|-------------|------------------|-------------|----------------------|--------------|----------------|
| PI3K-Akt signaling pathway_Homo sapiens_hsa04151                       | 3/341   | 0.007624982 | 0.078100644      | 0.010819483 | 0.106106862          | -2.015185734 | 9.826701297    |
| ECM-receptor interaction_Homo sapiens_hsa04512                         | 2/82    | 0.004322495 | 0.078100644      | 0.005982353 | 0.106106862          | -1.712523855 | 9.322847051    |
| Axon guidance_Homo sapiens_hsa04360                                    | 2/127   | 0.010077502 | 0.078100644      | 0.013691208 | 0.106106862          | -1.699541648 | 7.81355745     |
| Focal adhesion_Homo sapiens_hsa04510                                   | 2/202   | 0.024212934 | 0.12510016       | 0.032431827 | 0.167564438          | -1.796280058 | 6.683721562    |
| Butirosin and neomycin biosynthesis_Homo sapiens_hsa00524              | 1/5     | 0.005986214 | 0.078100644      | 0.008519652 | 0.106106862          | -1.093259598 | 5.595626269    |
| Aldosterone-regulated sodium reabsorption_Homo sapiens_hsa04960        | 1/39    | 0.045791114 | 0.141816974      | 0.055575735 | 0.170971042          | -1.460082232 | 4.502404812    |
| Glycosaminoglycan biosynthesis - keratan sulfate_Homo sapiens_hsa00533 | 1/15    | 0.017855781 | 0.110705845      | 0.022574    | 0.139958798          | -1.109394537 | 4.465787761    |
| Galactose metabolism_Homo sapiens_hsa00052                             | 1/30    | 0.035405791 | 0.141816974      | 0.043319495 | 0.170971042          | -1.319472288 | 4.408198443    |

## A549

| Term                                                                         | Overlap | P-value     | Adjusted P-value | Old P-value | Old Adjusted P-value | Z-score      | Combined Score |
|------------------------------------------------------------------------------|---------|-------------|------------------|-------------|----------------------|--------------|----------------|
| Leishmaniasis_Homo sapiens_hsa05140                                          | 3/73    | 0.001890254 | 0.190915615      | 0.004372114 | 0.441583495          | -1.876990118 | 11.77068813    |
| Serotonergic synapse_Homo sapiens_hsa04726                                   | 3/112   | 0.006313798 | 0.254618378      | 0.013680487 | 0.465500253          | -1.85642008  | 9.402800943    |
| Aldosterone-regulated sodium reabsorption_Homo sapiens_hsa04960              | 2/39    | 0.007562922 | 0.254618378      | 0.01382674  | 0.465500253          | -1.775340334 | 8.67164567     |
| Mineral absorption_Homo sapiens_hsa04978                                     | 2/51    | 0.012682087 | 0.320222707      | 0.022489415 | 0.516567006          | -1.672411785 | 7.304366714    |
| Herpes simplex infection_Homo sapiens_hsa05168                               | 3/185   | 0.024212124 | 0.364434728      | 0.048712627 | 0.516567006          | -1.658162838 | 6.169861054    |
| PPAR signaling pathway_Homo sapiens_hsa03320                                 | 2/69    | 0.022453493 | 0.364434728      | 0.038625342 | 0.516567006          | -1.593101129 | 6.047904297    |
| Arrhythmogenic right ventricular cardiomyopathy (ARVC)_Homo sapiens_hsa05412 | 2/74    | 0.025576904 | 0.364434728      | 0.043704333 | 0.516567006          | -1.613170591 | 5.913989069    |
| Complement and coagulation cascades_Homo sapiens_hsa04610                    | 2/79    | 0.028866117 | 0.364434728      | 0.049019197 | 0.516567006          | -1.595877856 | 5.657525511    |
| NF-kappa B signaling pathway_Homo sapiens_hsa04064                           | 2/93    | 0.03890573  | 0.401474639      | 0.065055076 | 0.516567006          | -1.539728881 | 4.998904952    |

Figure S1. The source data of pathway analysis

## Supplementary Figure S2

### ARPE-19

| Dex-treatment | Normalized by actin | Normalized by CTR (0hr, AVG) | AVG   |
|---------------|---------------------|------------------------------|-------|
| 0hr.          | 0.0267              | 1.1702                       | 1.00  |
|               | 0.0241              | 1.0585                       |       |
|               | 0.0176              | 0.7713                       |       |
| 16hr.         | 0.8009              | 0.9326                       | 38.63 |
|               | 0.8654              | 1.0078                       |       |
|               | 0.9099              | 1.0596                       |       |
| 24hr.         | 0.5067              | 0.8752                       | 26.00 |
|               | 0.5856              | 1.0115                       |       |
|               | 0.6446              | 1.1133                       |       |

### A549

| Dex-treatment | Normalized by actin | Normalized by CTR (0hr, AVG) | AVG  |
|---------------|---------------------|------------------------------|------|
| 0hr.          | 0.9197              | 1.0793                       | 1.00 |
|               | 0.8588              | 1.0078                       |      |
|               | 0.7779              | 0.9129                       |      |
| 16hr.         | 1.7214              | 1.0277                       | 1.97 |
|               | 1.6817              | 1.0040                       |      |
|               | 1.6220              | 0.9683                       |      |
| 24hr.         | 1.4628              | 0.9213                       | 1.87 |
|               | 1.5944              | 1.0042                       |      |
|               | 1.7060              | 1.0745                       |      |

Figure S2. The source data of Figure 3A, showing the increased expression of ENAC $\alpha$  by Dex treatment in ARPE-19 and A549 cells.
